# Supplementary material for: Inhibition of TXNIP expression in vivo blocks early pathologies of diabetic retinopathy
Source: PubMed Central journal article supplement — Cell Death Dis. 2010 Aug 19;1(8):e65–. doi: 10.1038/cddis.2010.42 (PMC3032527; doi:10.1038/cddis.2010.42), 2010-08-19
Supplement: cddis201042x1.pdf [file cddis201042x1.pdf]

CDDIS-10-0061R Supplementary Figures:

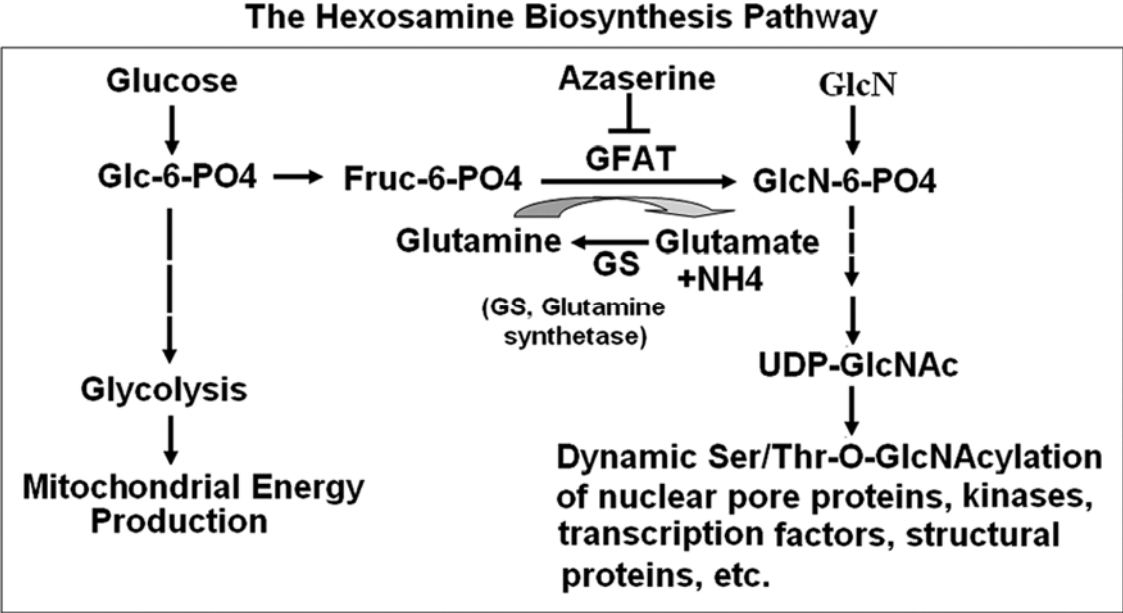

Figure S1.

**Normal retina**

**Diabetes, 4 wks**

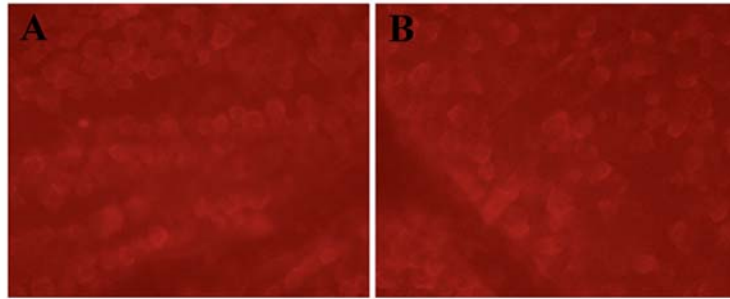

**Ethidium Bromide**

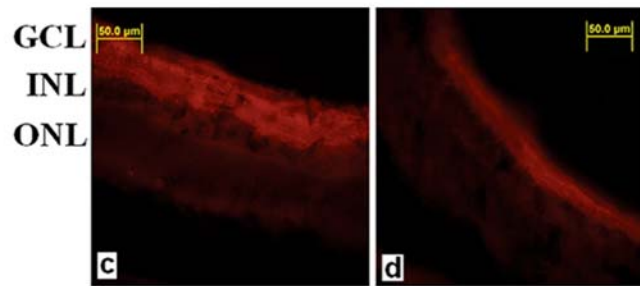

**Red - Synapsin 1**

**Figure S2.**

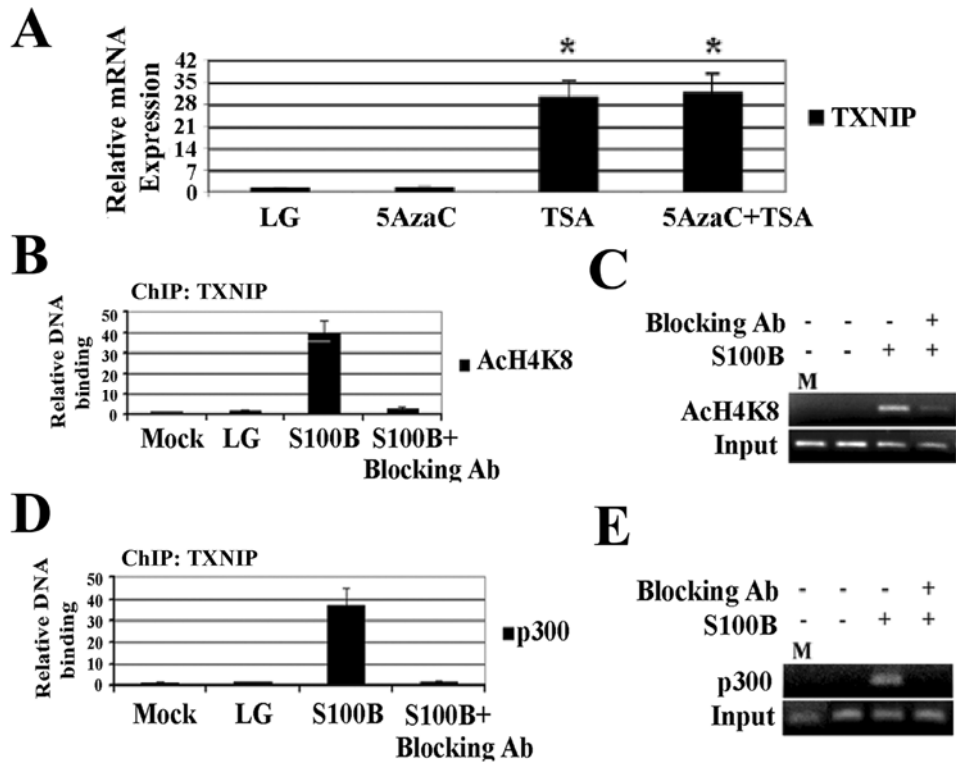

Figure S3.

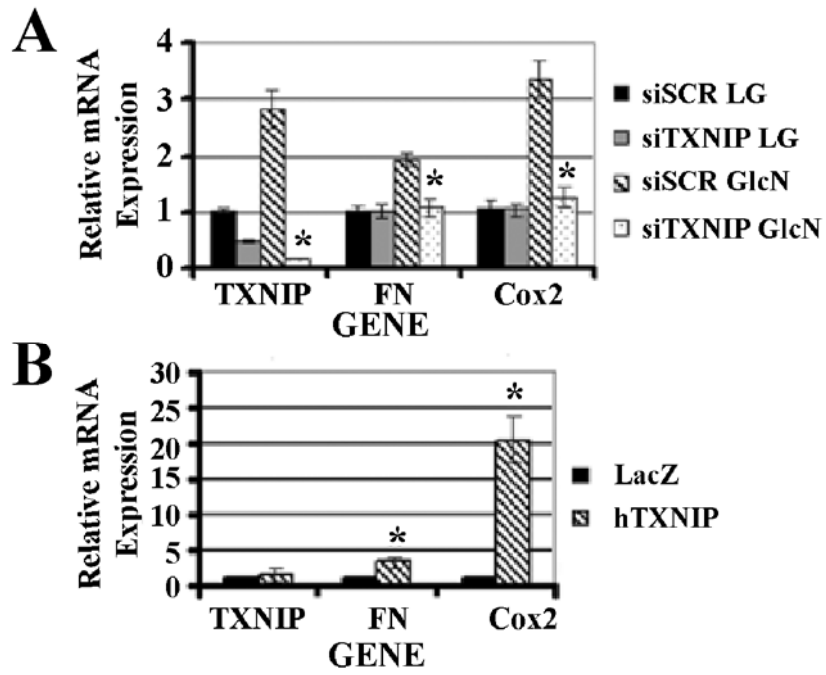

Figure S4.
